# Supplementary material
Source: PubMed Central journal article supplement (PMC6117341)

**A**

Plotted SNPs

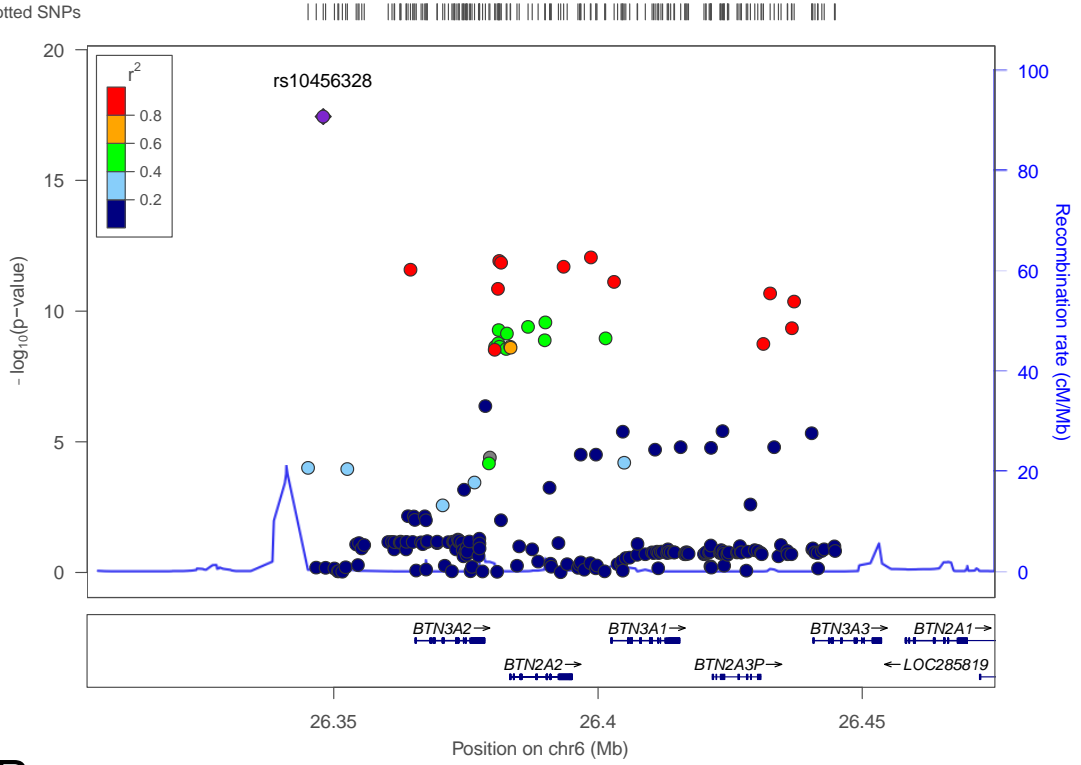

**B**

Plotted SNPs

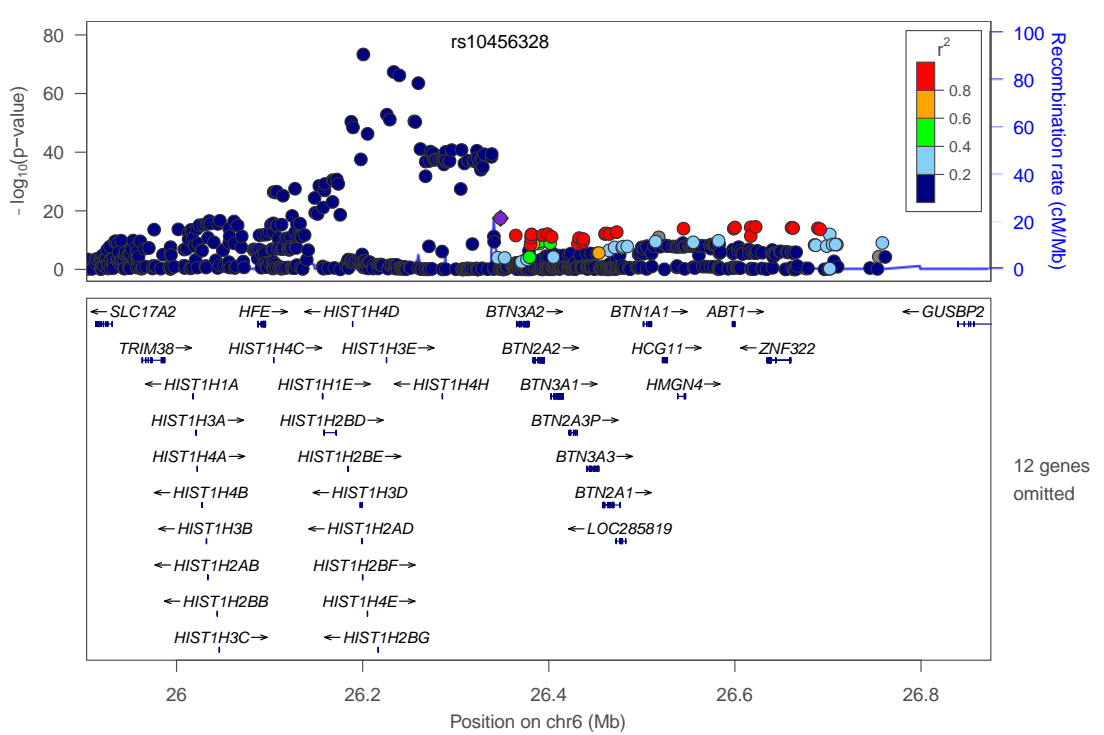

Supplement: 41431_2018_174_MOESM6_ESM.pdf [file 41431_2018_174_MOESM6_ESM.pdf]

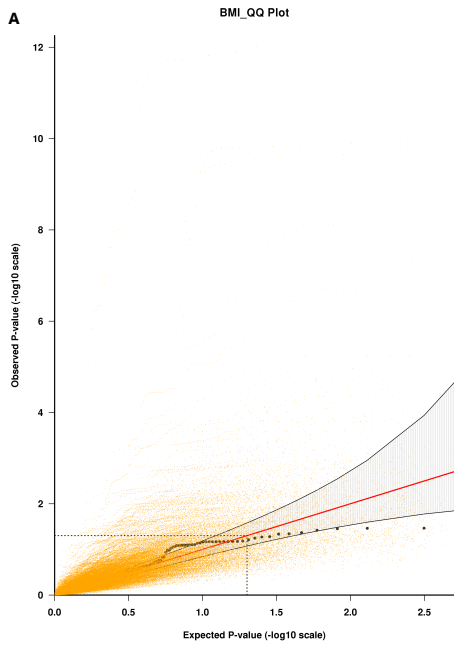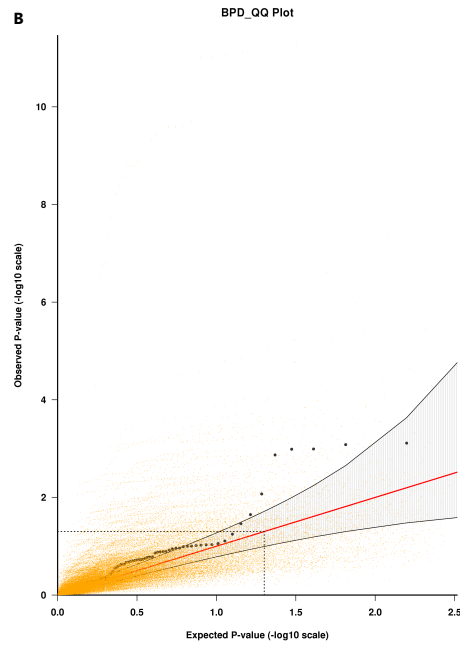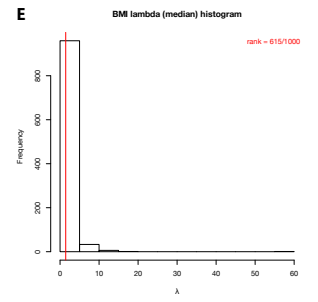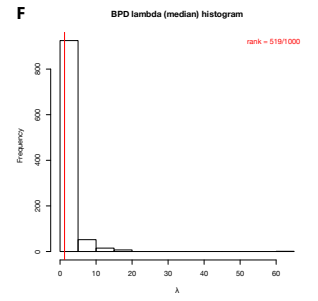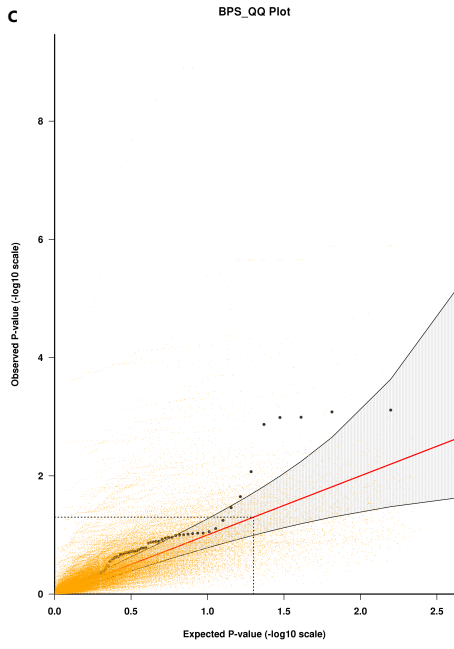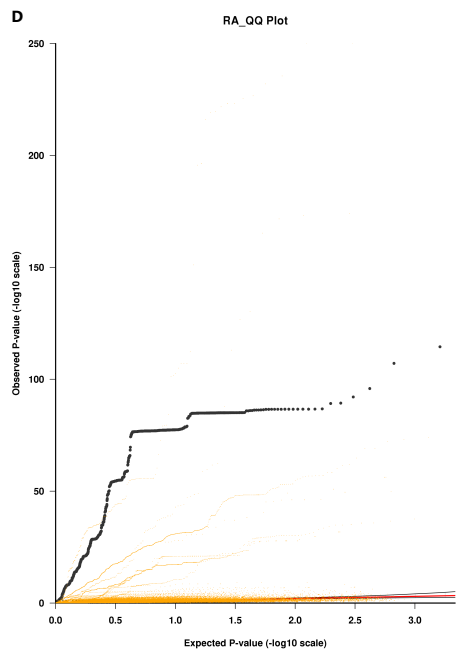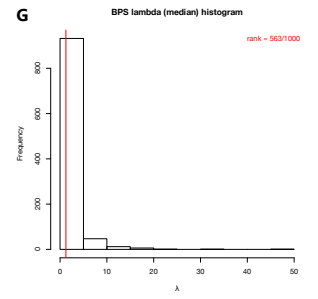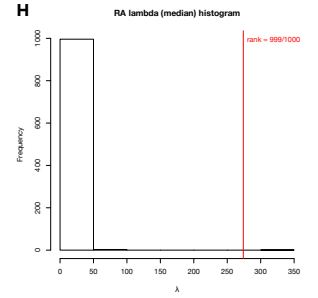

Supplement: 41431_2018_174_MOESM7_ESM.pdf [file 41431_2018_174_MOESM7_ESM.pdf]

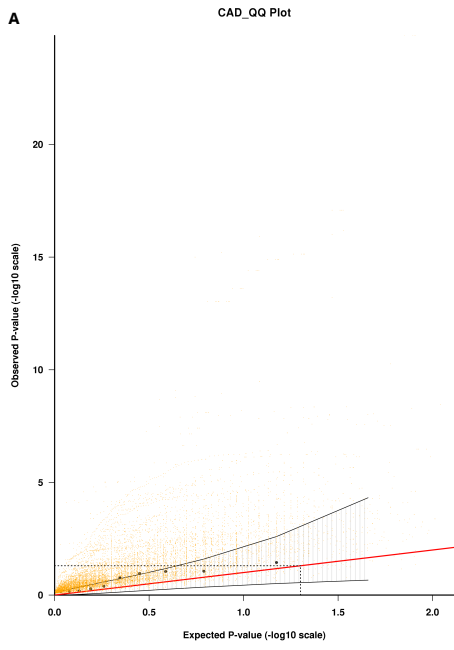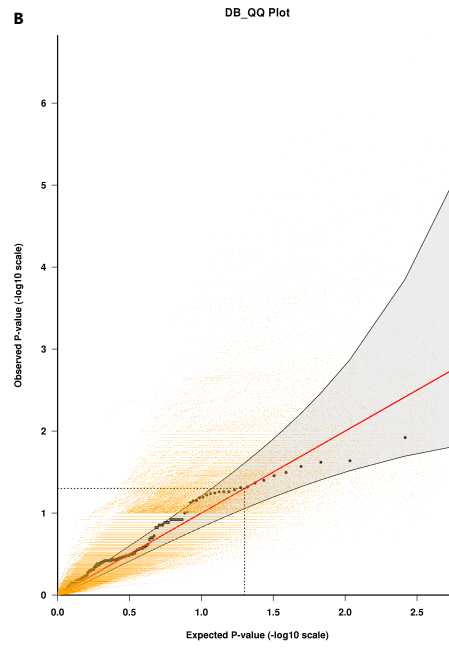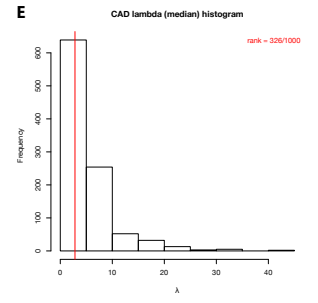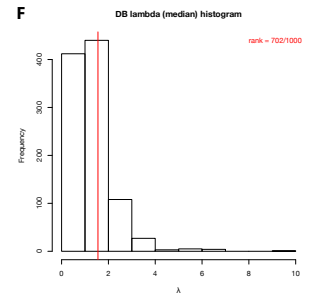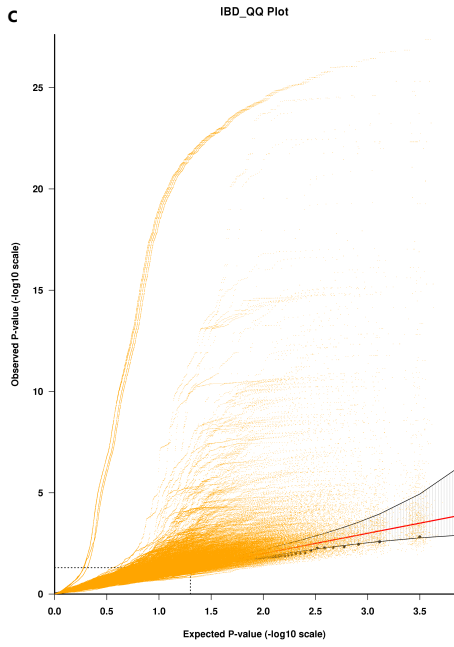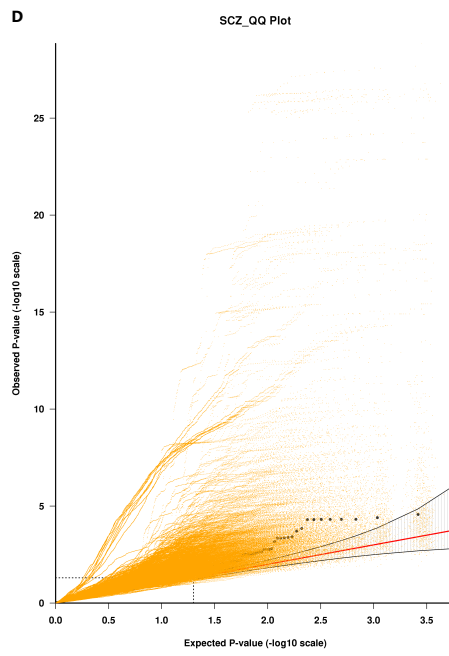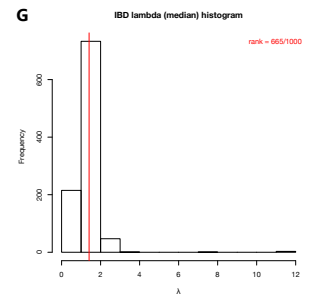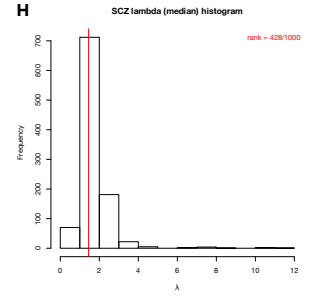

Supplement: 41431_2018_174_MOESM8_ESM.pdf [file 41431_2018_174_MOESM8_ESM.pdf]
